# Supplementary material
Source: Springer Nature journal article supplement (https://www.springermedizin.de/resource/supplementary/12960_2012_314_MOESM2_ESM.pdf/9569826)

## ***Traditional Model***

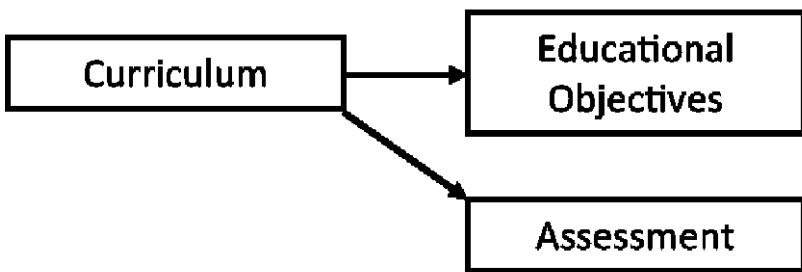

## ***CBE Model***

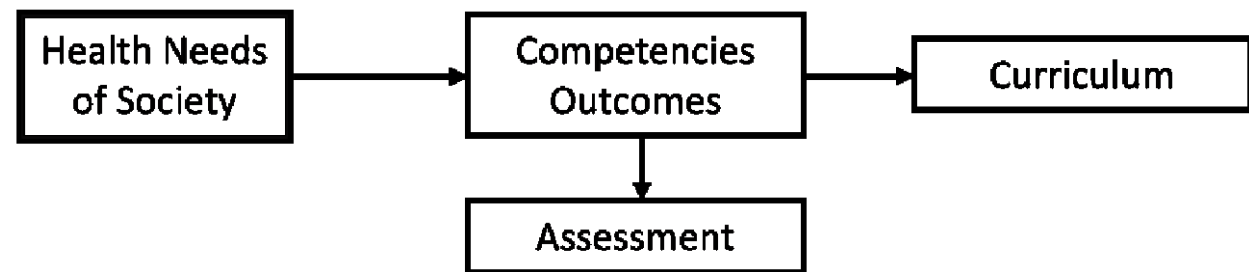

Supplement: MOESM2 [file 9569826]
